# Supplementary material
Source: PubMed Central journal article supplement (PMC3536109)
Supplement: AEM.02655-12_zam999103962so1.pdf [file AEM.02655-12_zam999103962so1.pdf]

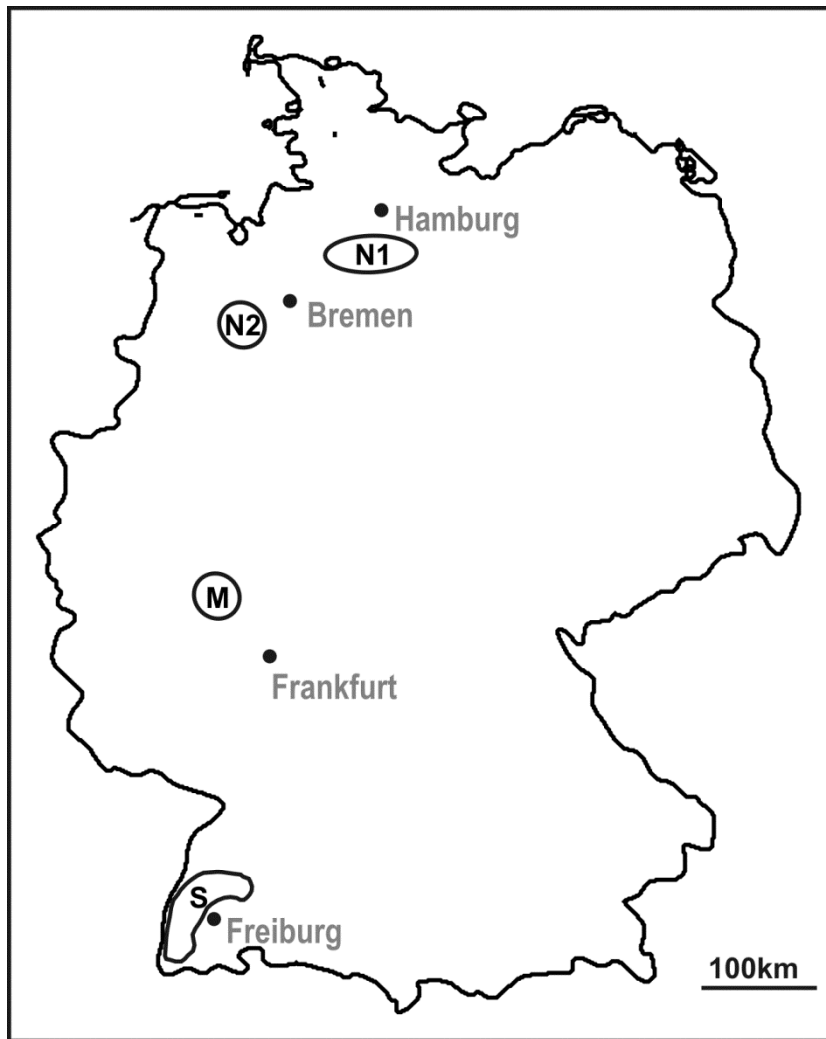

**FIG. S1** Map of Germany showing the locations of strawberry fields from which gray mold isolates were collected for this study. Region codes are: N1: Stader Geest; N2: Langförden/Vechta (both Northern Germany); M: Koblenz-Ahrweiler (Middle Germany); S: Breisgau region (Southern Germany).

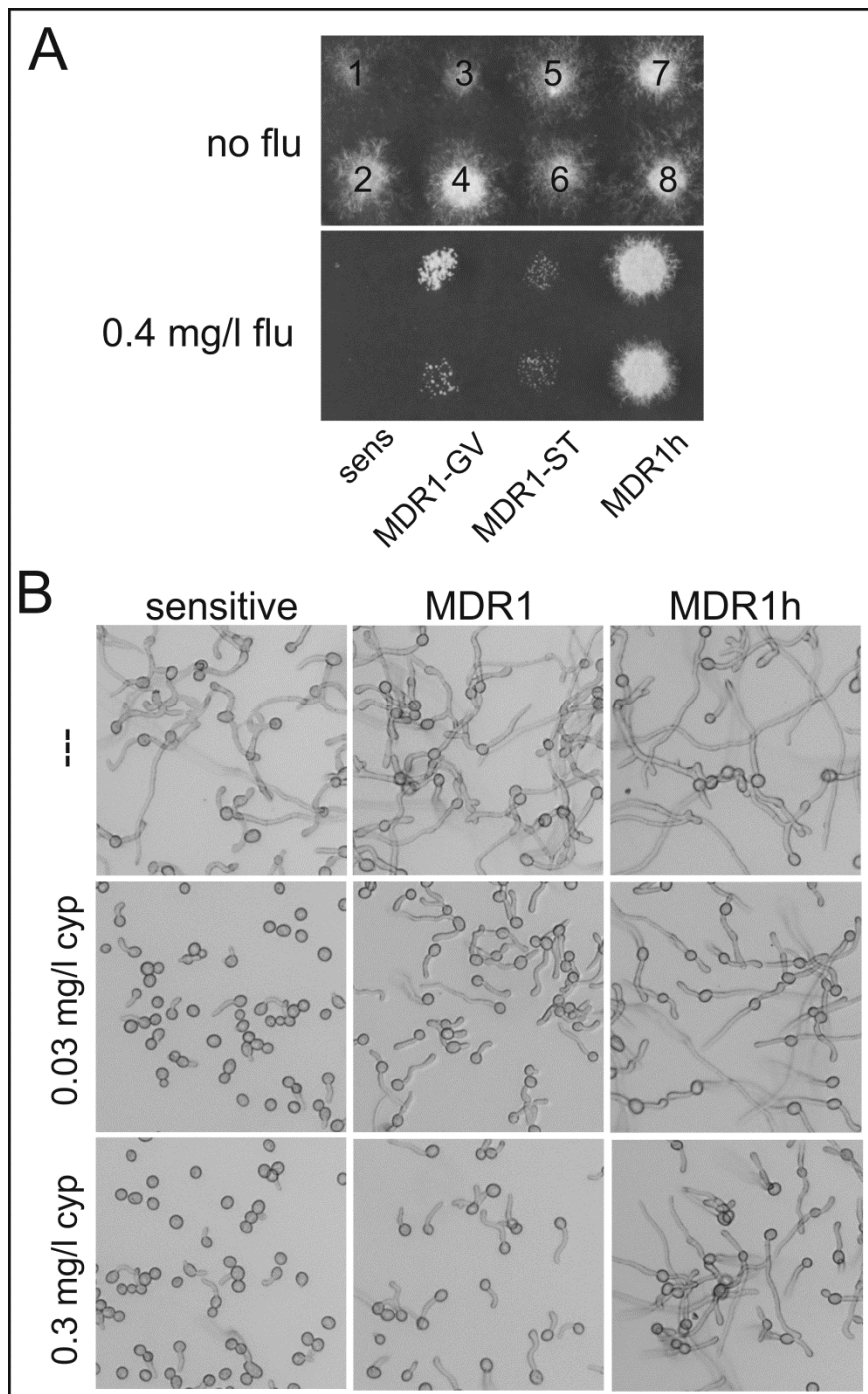

**FIG. S2** Germination and growth inhibition of sensitive, MDR1 and MDR1h isolates by fludioxonil (flu) and cyprodinil (cyp). A. Growth of sensitive isolates (1, 2), isolates with MDR1 phenotype (3-4: from grapes [GV]; 5-6: from strawberries [ST]), and isolates with MDR1h phenotype (7-8) on HA agar plates (3 days). Strains and isolates were inoculated as 5  $\mu$ l suspensions containing  $2 \times 10^5$  conidia  $\text{ml}^{-1}$ . 1: B0510; 2: D09\_K-2-3; 3: D10\_5-8; 4: D06\_5-16; 5: D09\_K\_2-17; 6: D09\_K\_3-1; 7: D09\_K\_1-01; 8: D09\_K\_4-04.

B. Germination of sensitive isolates in liquid Gamborg minimal medium containing no or 0.03 and 0.3  $\text{mg/l}^{-1}$  cyprodinil, after 16 h. Sensitive isolate: D09\_K-2-3; MDR1 isolate: D06\_5-16; MDR1h isolate: D09\_K\_4-05.





|                                        |                                                       |
|----------------------------------------|-------------------------------------------------------|
| <i>B. cinerea</i><br>(strain T4)       | 1483 ACC TAT CTC GCA GGT TCT GAT<br>495 T Y L A G S D |
| <i>Botrytis group S</i><br>(non-MDR1h) | ACC TAT GTC ACA TGT TCT GAT<br>T Y V T C S D          |
| <i>Botrytis group S</i><br>(MDR1h)     | ACC TAT G-- -CA TGT TCT GAT<br>T Y - A C S D          |

**FIG. S4** Alignment of an *mrr1* region showing sequence polymorphisms between 15 *B. cinerea* isolates including strain T4, seven non-MDR1h group S isolates, and eight MDR1h group S isolates. *Botrytis* group S-specific nucleotides and amino acids are shown in blue, and the changes in MDR1h isolates indicated in red. The MDR1h-related triplet deletion is  $\Delta$ L497 (compared to sensitive *B. cinerea* strain T4), or  $\Delta$ L497, T498A (compared to sensitive *Botrytis* group S strains).

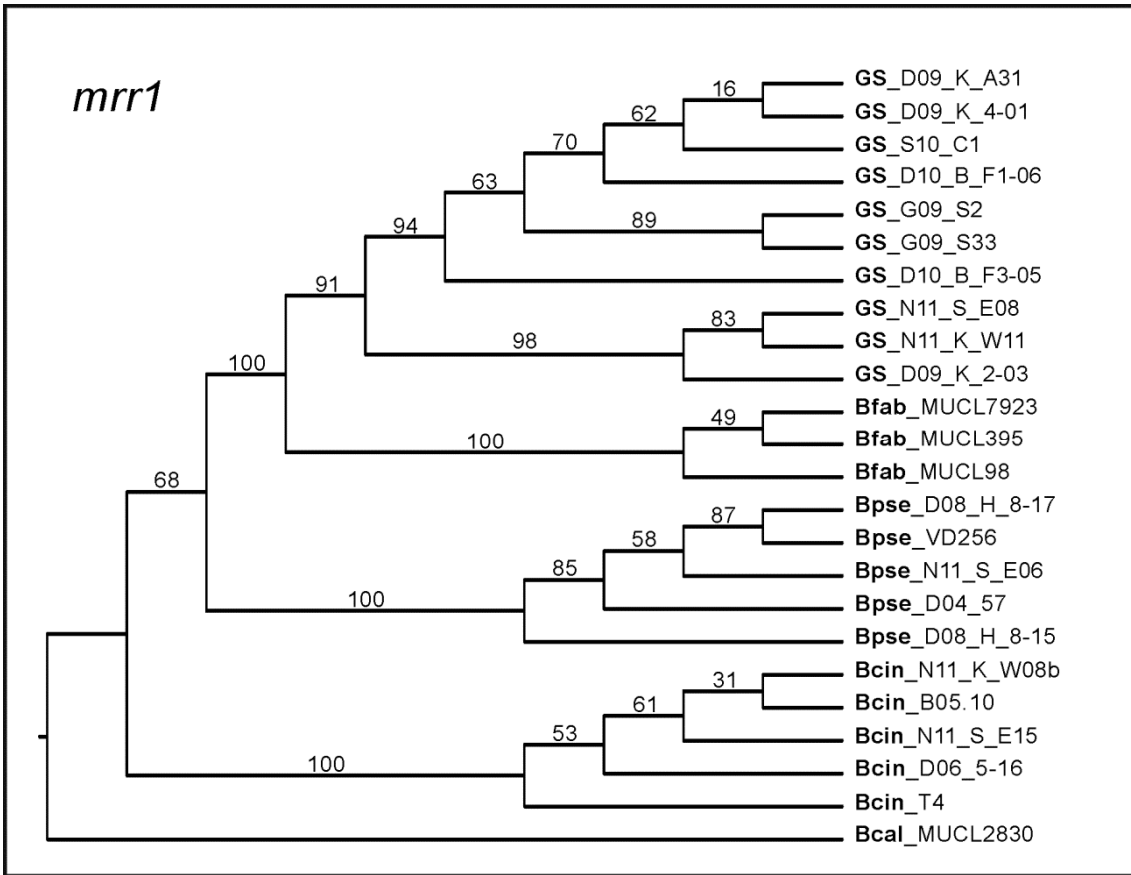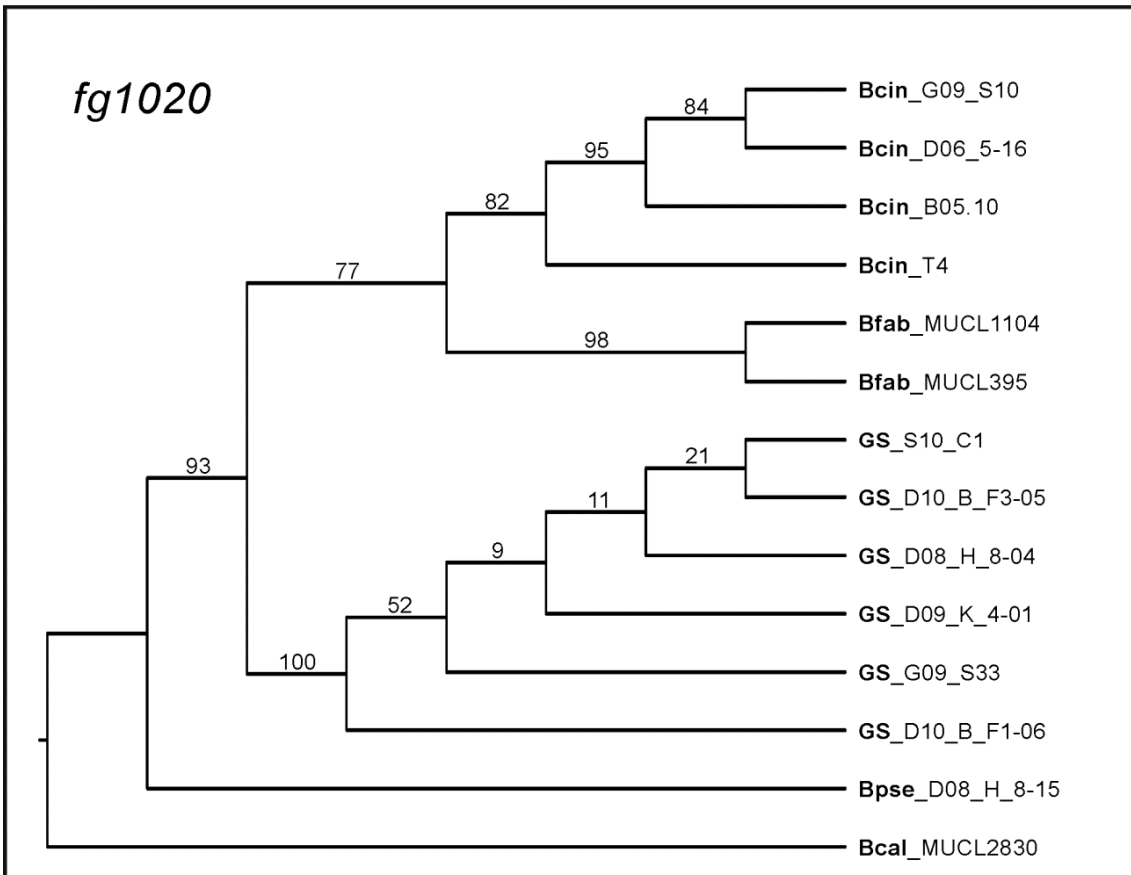

*hsp60*

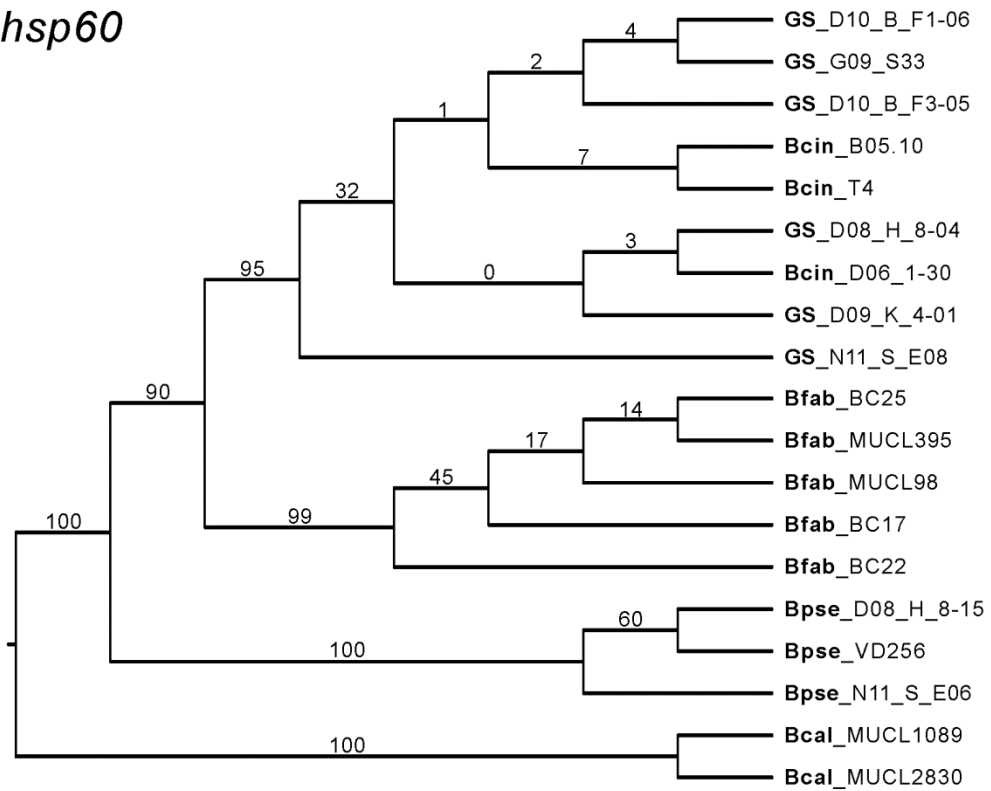

*nep2*

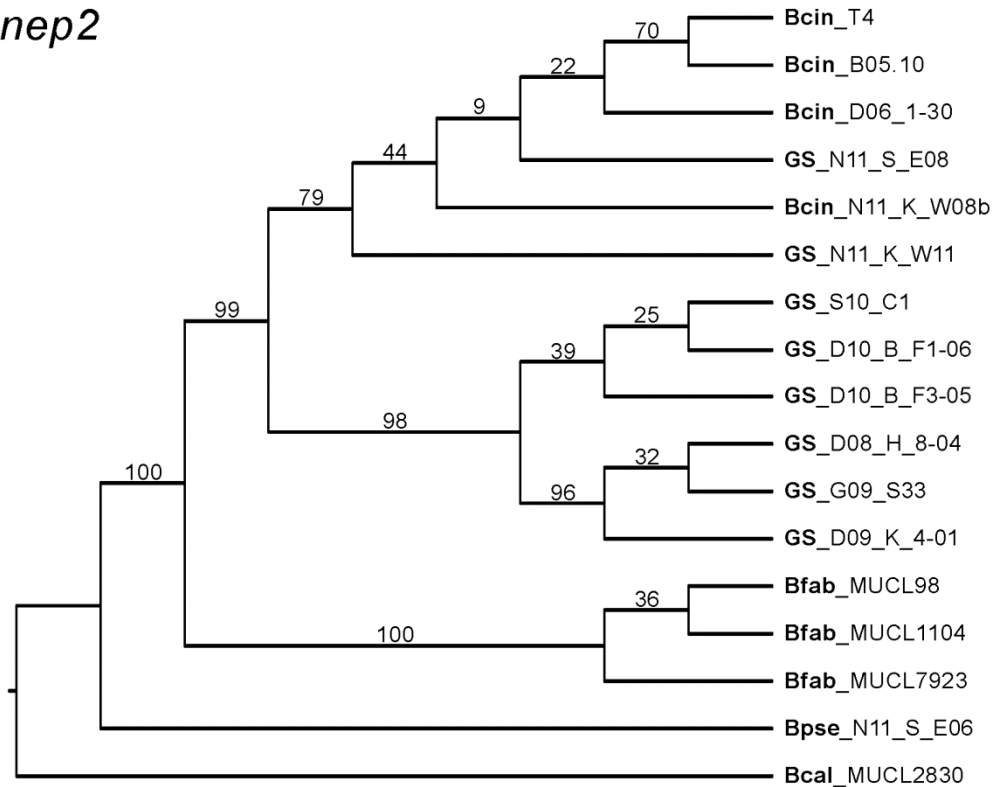

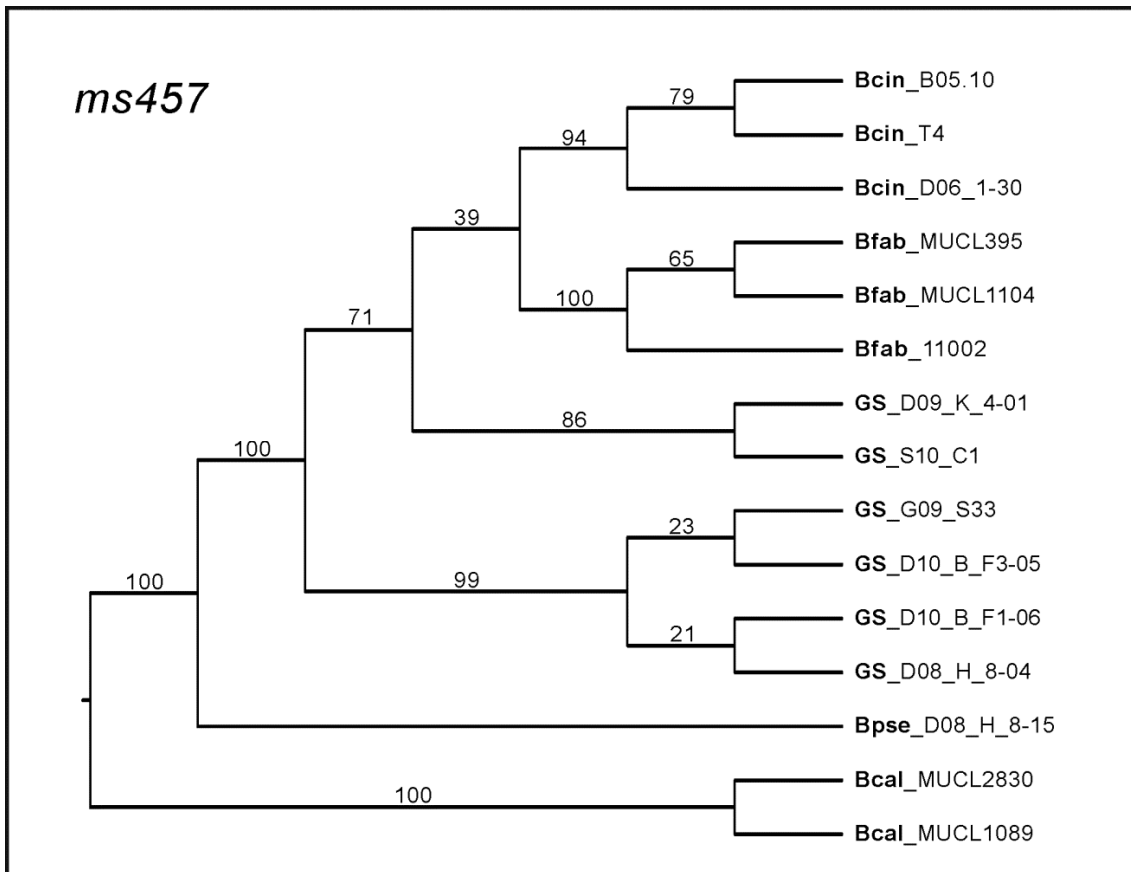

**FIG. S5** Cladograms based on maximum likelihood analysis of *mrr1*, *fg1020*, *hsp60*, *nep2*, and *ms547* of different *Botrytis* ssp. and group S isolates. Isolates/ Strains used for these alignments are listed in Tables S1 and S2, or from refs. (12, 38, 50).



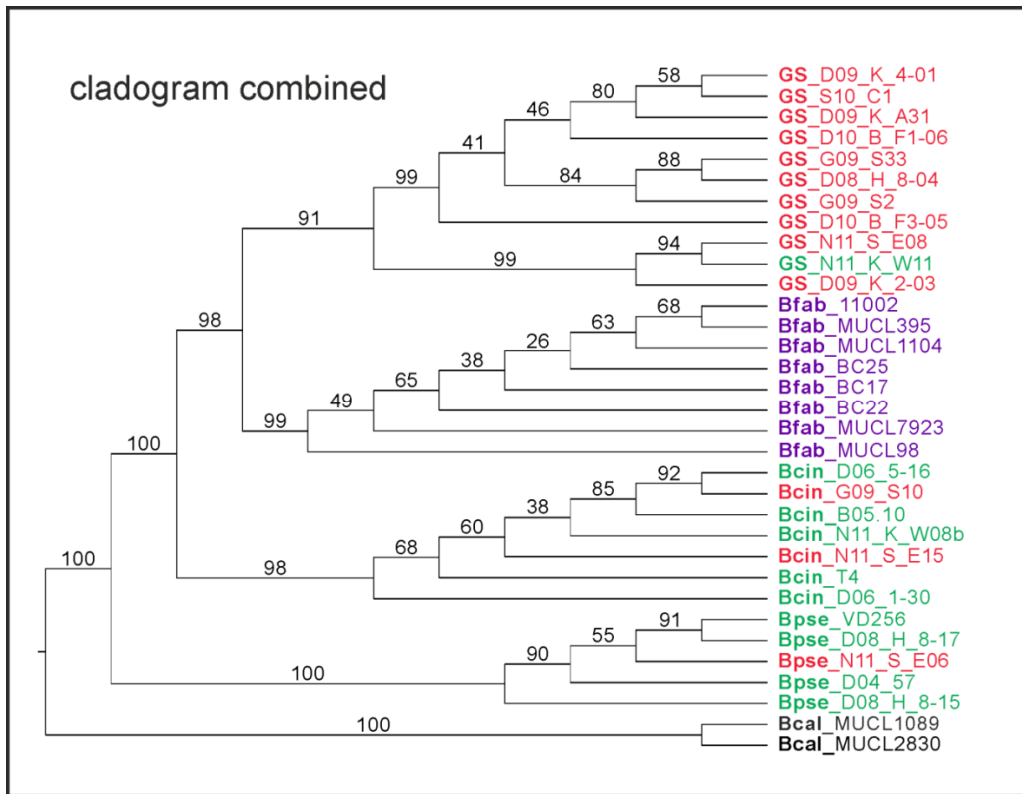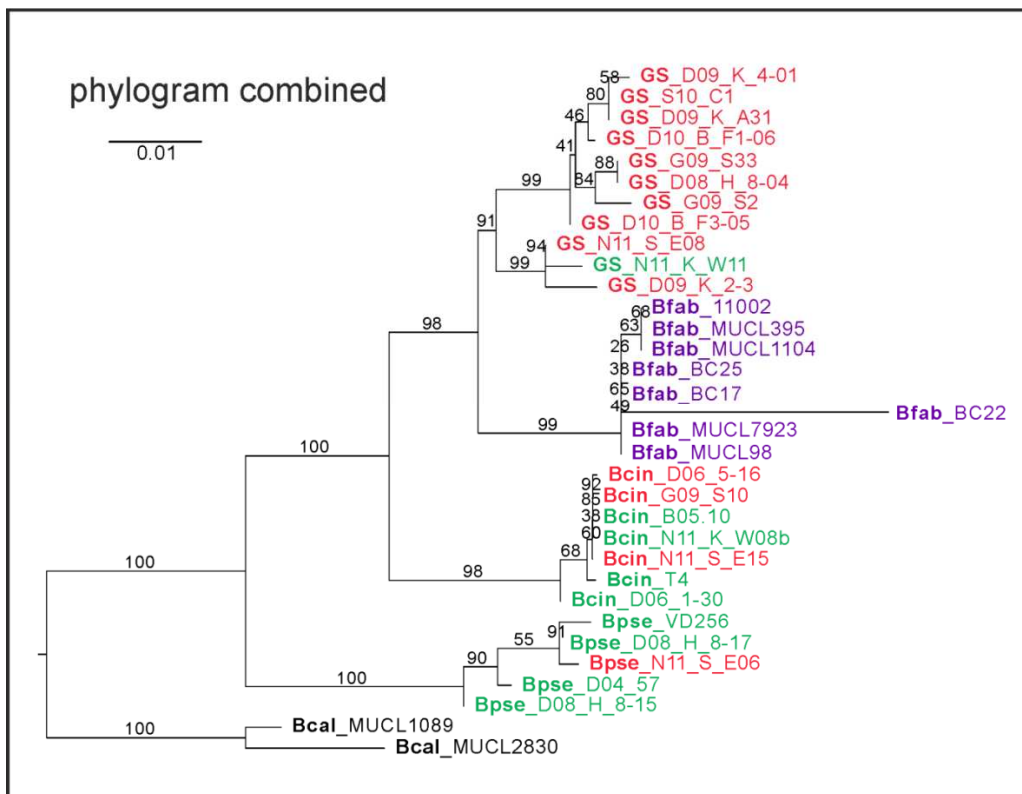

**FIG. S6** Cladogram and phylogram based on a combined maximum likelihood analysis of *mrr1*, *fg1020*, *hsp60*, *nep2*, and *ms547* of different *Botrytis* ssp. and group S isolates or strains (cf. Tables S1 and S2, and refs. 12, 38, 50). Species/ group abbreviations for the isolates are shown in bold (GS: Group S; Bcin: *B. cinerea*; Bfab; *B. fabae*; Bpse: *B. pseudocinerea*; Bcal: *B. calthae*) followed (for most GS, Bcin and Bpse isolates) by an underline and a letter indicating the country of origin (D: Germany; G: Greece; N: Norway; S: Spain). Colors indicate the host plants strawberry (red), grapevine (green), faba bean (purple), and *Caltha palustris* (black).

**Table S1** Origin of strawberry isolates analyzed in this study.

Region: N1: Stader Geest (three sampling sites); N2, Langförden/Vechta (one sampling site); M, Koblenz-Ahrweiler (four sampling sites); S, Breisgau (four sampling sites: a, Schupfholz; b, Denzlingen; c, Buchholz; d, Neuenburg). Fen, fenhexamide; Ipr, iprodione; Car, carbendazim; Bos, boscalid; Azo, azoxystrobin; Cyp, cyprodinil; IGS type, IGS-RFLP (*Hinf1*) pattern; 21bp repeat, *mrr1* 21 bp repeat; *mrr1*  $\Delta$ 3bp deletion. *hch* type, *hch* *HhaI* digestion pattern; MAT, mating type specific PCR. \*Isolates described in ref. (18).

Fungicide treatments: T1 (2011): Signum; Switch; Teldor; Flint; Switch. T2 (2011): Switch; Signum; Switch; Teldor; Flint; Switch; Switch; Signum. T3 (2008): Teldor+Ortiva; Switch; Signum; Switch; Teldor+Ortiva. T4 (2009): Signum; Switch; Ortiva+Teldor; Switch; Ortiva+Teldor. T5 (2009): Rovral; Signum; Ortiva+Teldor; Rovral; Flint; Ortiva; Rovral; Teldor; Signum; Teldor+Ortiva. T6 (2009): Signum; Teldor+Ortiva; Switch; Teldor+Ortiva; Switch; Teldor+Ortiva; Signum. T7 (2010): Flint; Signum; Switch; Teldor+Flint; Switch; Switch. T8 (2010): Switch; Switch. T9 (2010): Flint; Signum; Switch; Teldor+Flint; Switch; Switch.

| No. | Isolate name    | Origin        | Fungicide sensitivity/<br>resistance |     |     |     |     |     | MDR   | IGS<br>type | 21bp<br>repeat | <i>mrr1</i><br>$\Delta$ 3bp | <i>hch</i><br>type | MAT<br>type |
|-----|-----------------|---------------|--------------------------------------|-----|-----|-----|-----|-----|-------|-------------|----------------|-----------------------------|--------------------|-------------|
|     |                 |               | Fen                                  | Ipr | Car | Bos | Azo | Cyp |       |             |                |                             |                    |             |
| 1   | D08_H_8-06a     | N1a/2008/n.a. | S                                    | S   | S   | S   | S   | S   | MDR1  | 0           | yes            | no                          | 2                  | 2           |
| 2   | D08_H_8-06b     | N1a/2008/n.a. | S                                    | R   | R   | S   | R   | R   | MDR1h | 3           | yes            | yes                         | 2                  | 1           |
| 3   | D08_H_8-07a     | N1a/2008/n.a. | S                                    | R   | S   | S   | R   | S   | MDR1h | 3           | yes            | yes                         | 2                  | 2           |
| 4   | D11_H_R.1-10    | N1b/2011/T1   | R                                    | S   | S   | S   | R   | S   | MDR1h | n.a.        | yes            | yes                         | n.a.               | n.a.        |
| 5   | D11_H_R.1-2     | N1b/2011/T1   | S                                    | R   | S   | S   | S   | S   | MDR1  | n.a.        | no             | n.a.                        | n.a.               | 2           |
| 6   | D11_H_R.1-3     | N1b/2011/T1   | R                                    | S   | S   | S   | R   | S   | no    | n.a.        | no             | n.a.                        | 2                  | n.a.        |
| 7   | D11_H_R.1-4     | N1b/2011/T1   | S                                    | R   | S   | S   | R   | S   | MDR1  | n.a.        | yes            | n.a.                        | n.a.               | n.a.        |
| 8   | D11_H_R.1-6     | N1b/2011/T1   | R                                    | S   | S   | S   | R   | R   | MDR1  | n.a.        | yes            | no                          | n.a.               | n.a.        |
| 9   | D11_H_R.1-7     | N1b/2011/T1   | R                                    | R   | S   | S   | R   | R   | MDR1  | n.a.        | yes            | no                          | n.a.               | n.a.        |
| 10  | D11_H_R.1-9     | N1b/2011/T1   | R                                    | S   | S   | S   | R   | S   | MDR1  | n.a.        | yes            | no                          | n.a.               | n.a.        |
| 11  | D11_H_R.2-10    | N1b/2011/T1   | S                                    | S   | S   | S   | R   | S   | no    | n.a.        | yes            | n.a.                        | n.a.               | n.a.        |
| 12  | D11_H_R.2-3     | N1b/2011/T1   | R                                    | R   | R   | S   | R   | S   | MDR1  | n.a.        | yes            | no                          | n.a.               | n.a.        |
| 13  | D11_H_R.2-4     | N1b/2011/T1   | R                                    | R   | R   | S   | R   | R   | MDR1h | n.a.        | yes            | yes                         | n.a.               | n.a.        |
| 14  | D11_H_R.2-6     | N1b/2011/T1   | R                                    | S   | S   | S   | S   | S   | MDR1h | n.a.        | yes            | yes                         | n.a.               | n.a.        |
| 15  | D11_H_R.2-8     | N1b/2011/T1   | R                                    | R   | R   | S   | R   | S   | MDR1  | n.a.        | yes            | no                          | n.a.               | n.a.        |
| 16  | D11_H_R.3-8     | N1b/2011/T1   | R                                    | S   | R   | R   | R   | R   | MDR1h | n.a.        | yes            | yes                         | n.a.               | n.a.        |
| 17  | D11_H_R.3-9     | N1b/2011/T1   | R                                    | S   | S   | S   | R   | S   | no    | n.a.        | yes            | n.a.                        | n.a.               | n.a.        |
| 18  | D11_H_R.4-4     | N1b/2011/T1   | S                                    | R   | R   | S   | R   | S   | no    | n.a.        | no             | n.a.                        | 2                  | n.a.        |
| 19  | D11_H_R.4-7     | N1b/2011/T1   | S                                    | R   | R   | S   | R   | S   | MDR1  | n.a.        | no             | n.a.                        | 2                  | n.a.        |
| 20  | D11_H_BI.119.01 | N1c/2011/T2   | R                                    | R   | R   | S   | R   | S   | MDR1  | n.a.        | yes            | no                          | n.a.               | n.a.        |
| 21  | D11_H_BI.119.02 | N1c/2011/T2   | S                                    | S   | S   | R   | R   | S   | no    | n.a.        | yes            | n.a.                        | n.a.               | n.a.        |
| 22  | D11_H_BI.119.03 | N1c/2011/T2   | S                                    | R   | S   | R   | R   | S   | no    | n.a.        | yes            | no                          | n.a.               | n.a.        |
| 23  | D11_H_BI.119.04 | N1c/2011/T2   | R                                    | S   | R   | S   | R   | S   | MDR1h | n.a.        | yes            | yes                         | n.a.               | n.a.        |
| 24  | D11_H_BI.119.05 | N1c/2011/T2   | R                                    | R   | R   | R   | R   | R   | MDR1h | n.a.        | yes            | yes                         | n.a.               | n.a.        |
| 25  | D11_H_BI.119.06 | N1c/2011/T2   | S                                    | S   | S   | S   | R   | S   | MDR1  | n.a.        | yes            | n.a.                        | n.a.               | n.a.        |
| 26  | D11_H_BI.119.08 | N1c/2011/T2   | R                                    | S   | R   | R   | R   | S   | MDR1h | n.a.        | yes            | yes                         | n.a.               | n.a.        |
| 27  | D11_H_BI.119.09 | N1c/2011/T2   | R                                    | S   | R   | S   | R   | S   | MDR1  | n.a.        | no             | n.a.                        | 2                  | n.a.        |
| 28  | D11_H_BI.119.10 | N1c/2011/T2   | R                                    | S   | S   | R   | R   | S   | no    | n.a.        | yes            | no                          | n.a.               | n.a.        |
| 29  | D11_H_BI.119.11 | N1c/2011/T2   | S                                    | S   | S   | S   | R   | R   | MDR1h | n.a.        | yes            | yes                         | n.a.               | n.a.        |
| 30  | D11_H_BI.119.12 | N1c/2011/T2   | R                                    | R   | R   | S   | R   | R   | MDR1  | n.a.        | yes            | no                          | n.a.               | n.a.        |
| 31  | D11_H_BI.119.13 | N1c/2011/T2   | R                                    | R   | R   | S   | R   | S   | MDR1  | n.a.        | yes            | no                          | n.a.               | n.a.        |
| 32  | D11_H_BI.119.14 | N1c/2011/T2   | R                                    | R   | R   | S   | R   | R   | MDR1h | n.a.        | yes            | yes                         | n.a.               | n.a.        |
| 33  | D11_H_BI.119.15 | N1c/2011/T2   | R                                    | R   | S   | S   | R   | R   | MDR1  | n.a.        | yes            | n.a.                        | n.a.               | n.a.        |
| 34  | D11_H_BI.119.16 | N1c/2011/T2   | R                                    | R   | S   | S   | R   | S   | MDR1h | n.a.        | yes            | yes                         | n.a.               | n.a.        |
| 35  | D11_H_BI.119.17 | N1c/2011/T2   | S                                    | S   | S   | S   | R   | S   | MDR1  | n.a.        | yes            | no                          | n.a.               | n.a.        |
| 36  | D11_H_BI.119.18 | N1c/2011/T2   | R                                    | R   | R   | S   | R   | S   | MDR1  | n.a.        | yes            | no                          | n.a.               | n.a.        |
| 37  | D11_H_BI.119.19 | N1c/2011/T2   | S                                    | S   | S   | S   | R   | S   | MDR1  | n.a.        | yes            | n.a.                        | n.a.               | n.a.        |
| 38  | D11_H_BI.119.20 | N1c/2011/T2   | S                                    | S   | S   | S   | R   | S   | MDR1  | n.a.        | yes            | n.a.                        | n.a.               | n.a.        |
| 39  | D11_H_BI.119.21 | N1c/2011/T2   | R                                    | R   | R   | S   | R   | R   | MDR1h | n.a.        | yes            | yes                         | n.a.               | n.a.        |
| 40  | D11_H_BI.119.22 | N1c/2011/T2   | R                                    | S   | S   | R   | R   | S   | MDR1h | n.a.        | yes            | n.a.                        | n.a.               | n.a.        |
| 41  | D11_H_BI.119.23 | N1c/2011/T2   | S                                    | S   | S   | R   | R   | S   | no    | n.a.        | yes            | no                          | n.a.               | n.a.        |
| 42  | D11_H_BI.119.24 | N1c/2011/T2   | S                                    | S   | S   | S   | R   | S   | MDR1  | n.a.        | no             | n.a.                        | 2                  | n.a.        |
| 43  | D11_H_BI.119.25 | N1c/2011/T2   | R                                    | R   | R   | S   | R   | S   | MDR1h | n.a.        | yes            | yes                         | n.a.               | n.a.        |
| 44  | D11_H_BI.119.26 | N1c/2011/T2   | S                                    | S   | R   | S   | R   | S   | MDR1h | n.a.        | yes            | n.a.                        | n.a.               | n.a.        |
| 45  | D11_H_BI.119.27 | N1c/2011/T2   | S                                    | S   | R   | S   | R   | S   | no    | n.a.        | yes            | n.a.                        | n.a.               | n.a.        |

|     |       |           |              |   |      |   |   |   |      |       |      |     |      |      |      |
|-----|-------|-----------|--------------|---|------|---|---|---|------|-------|------|-----|------|------|------|
| 46  | D11_H | Bl.119.28 | N1c/2011/T2  | S | S    | R | S | R | R    | no    | n.a. | yes | n.a. | n.a. | n.a. |
| 47  | D11_H | Bl.119.29 | N1c/2011/T2  | R | S    | R | S | R | R    | MDR1  | n.a. | yes | no   | n.a. | n.a. |
| 48  | D11_H | Bl.119.30 | N1c/2011/T2  | S | S    | R | S | R | S    | MDR1  | n.a. | no  | n.a. | 2    | n.a. |
| 49  | D08_H | 8-01      | N2/2008/T3   | S | S    | S | S | S | S    | MDR1  | 0    | yes | no   | 2    | 2    |
| 50  | D08_H | 8-03      | N2/2008/T3   | S | S    | S | S | S | S    | MDR1  | 0    | yes | no   | 2    | 2    |
| 51  | D08_H | 8-04      | N2/2008/no   | S | S    | S | S | R | S    | no    | 3    | yes | no   | 2    | 2    |
| 52  | D08_H | 8-13      | N2/2008/T3   | S | S    | S | S | S | S    | no    | 0    | no  | no   | 1    | 1    |
| 53  | D08_H | 8-15      | N2/2008/T3   | S | S    | S | S | S | S    | no    | 0    | no  | no   | 1    | 2    |
| 54  | D08_H | 8-16      | N2/2008/T3   | S | R    | S | S | R | R    | MDR1h | 13   | yes | yes  | 2    | 2    |
| 55  | D08_H | 8-17      | N2/2008/T3   | S | S    | S | S | S | S    | no    | 0    | no  | no   | 1    | 2    |
| 56  | D08_H | 8-18*     | N2/2008/T3   | S | S    | R | S | S | S    | no    | 0    | no  | n.a. | n.a. | 2    |
| 57  | D08_H | 8-19      | N2/2008/T3   | S | R    | R | S | R | S    | MDR1h | 3    | yes | yes  | 2    | 1    |
| 58  | D08_H | 8-20      | N2/2008/T3   | S | R    | S | S | R | R    | MDR1h | 3    | yes | yes  | 2    | 1    |
| 59  | D08_H | 8-21*     | N2/2008/T3   | S | n.a. | R | S | R | S    | MDR1  | 3    | yes | no   | 2    | 1    |
| 60  | D08_H | 8-22*     | N2/2008/T3   | S | S    | S | S | S | S    | no    | 0    | no  | n.a. | 2    | 1    |
| 61  | D09_K | 1-01      | Ma/2009/T4   | R | R    | S | S | R | R    | MDR1h | 3    | yes | yes  | 2    | 1    |
| 62  | D09_K | 1-02      | Ma/2009/T4   | R | R    | R | S | R | R    | MDR1h | 3    | yes | yes  | 2    | 1    |
| 63  | D09_K | 1-03      | Ma/2009/T4   | R | R    | S | S | S | R    | MDR1  | 3    | yes | no   | 2    | 2    |
| 64  | D09_K | 1-04      | Ma/2009/T4   | R | R    | R | S | R | R    | MDR1h | 3    | yes | yes  | 2    | 1    |
| 65  | D09_K | 1-05      | Ma/2009/T4   | R | R    | R | S | R | S    | MDR1  | 3    | yes | n.a. | 2    | 1    |
| 66  | D09_K | 1-06      | Ma/2009/T4   | R | R    | S | S | S | S    | MDR1h | 3    | yes | yes  | 2    | 2    |
| 67  | D09_K | 1-07      | Ma/2009/T4   | S | S    | S | S | S | S    | no    | 0    | no  | no   | 2    | 2    |
| 68  | D09_K | 1-08      | Ma/2009/T4   | R | R    | S | S | R | S    | MDR1h | 3    | yes | yes  | 2    | 2    |
| 69  | D09_K | 1-09      | Ma/2009/T4   | R | R    | S | S | R | R    | MDR1h | 0    | yes | yes  | 2    | 1    |
| 70  | D09_K | 1-10      | Ma/2009/T4   | R | R    | S | S | R | R    | MDR1h | 3    | yes | yes  | 2    | 1    |
| 71  | D09_K | 2-01      | Mb/2009/T5   | R | R    | R | S | R | R    | MDR1h | 3    | yes | yes  | 2    | 2    |
| 72  | D09_K | 2-02      | Mb/2009/T5   | S | R    | R | S | S | n.a. | no    | 0    | no  | n.a. | 2    | 2    |
| 73  | D09_K | 2-03      | Mb/2009/T5   | S | S    | S | S | S | S    | no    | 4    | yes | no   | 2    | 1    |
| 74  | D09_K | 2-04      | Mb/2009/T5   | S | S    | R | S | R | R    | no    | 5    | no  | no   | 2    | 1    |
| 75  | D09_K | 2-05      | Mb/2009/T5   | S | S    | R | S | R | R    | no    | 0    | no  | n.a. | 2    | 2    |
| 76  | D09_K | 2-06      | Mb/2009/T5   | R | R    | S | S | R | R    | MDR1h | 3    | yes | yes  | 2    | 1    |
| 77  | D09_K | 2-07      | Mb/2009/T5   | R | S    | S | S | S | S    | MDR1  | 0    | no  | no   | 2    | 2    |
| 78  | D09_K | 2-08      | Mb/2009/T5   | R | S    | S | S | R | R    | MDR1  | 3    | yes | no   | 2    | 2    |
| 79  | D09_K | 2-09      | Mb/2009/T5   | R | R    | R | S | R | R    | MDR1h | 3    | yes | yes  | 2    | 2    |
| 80  | D09_K | 2-10      | Mb/2009/T5   | S | S    | R | S | R | S    | no    | 13   | no  | no   | 2    | 2    |
| 81  | D09_K | 3-01      | Mc/2009/T6   | R | R    | R | S | R | R    | MDR1  | 3    | yes | no   | 2    | 2    |
| 82  | D09_K | 3-03      | Mc/2009/T6   | R | R    | S | S | R | R    | MDR1h | 3    | yes | yes  | 2    | 1    |
| 83  | D09_K | 3-04      | Mc/2009/T6   | R | R    | R | S | R | R    | MDR1  | 14   | yes | no   | 2    | 1    |
| 84  | D09_K | 3-05      | Mc/2009/T6   | R | R    | R | S | R | R    | MDR1h | 3    | yes | yes  | 2    | 1    |
| 85  | D09_K | 3-06      | Mc/2009/T6   | R | R    | R | S | R | R    | MDR1h | 3    | yes | yes  | 2    | 1    |
| 86  | D09_K | 3-07      | Mc/2009/T6   | R | R    | S | S | R | S    | MDR1h | 3    | yes | yes  | 2    | 1    |
| 87  | D09_K | 3-08      | Mc/2009/T6   | R | R    | S | S | R | S    | MDR1h | 3    | yes | yes  | 2    | 1    |
| 88  | D09_K | 3-09      | Mc/2009/T6   | R | R    | S | S | R | R    | MDR1h | 14   | yes | yes  | 2    | 2    |
| 89  | D09_K | 3-10      | Mc/2009/T6   | R | R    | R | S | R | R    | MDR1h | 3    | yes | yes  | 2    | 1    |
| 90  | D09_K | 4-01      | Md/2009/T5   | R | R    | S | S | R | R    | MDR1h | 3    | yes | yes  | 2    | 2    |
| 91  | D09_K | 4-02      | Md/2009/T5   | S | S    | S | S | S | S    | MDR1  | 0    | yes | no   | 2    | 1    |
| 92  | D09_K | 4-03      | Md/2009/T5   | R | S    | S | S | S | R    | MDR1  | 3    | yes | no   | 2    | 1    |
| 93  | D09_K | 4-04      | Md/2009/T5   | R | R    | S | S | R | R    | MDR1h | 0    | yes | yes  | 2    | 2    |
| 94  | D09_K | 4-05      | Md/2009/T5   | R | R    | R | S | R | S    | MDR1h | 3    | yes | yes  | 2    | 1    |
| 95  | D09_K | 4-06      | Md/2009/T5   | R | R    | R | S | R | R    | MDR1h | 3    | yes | yes  | 2    | 1    |
| 96  | D09_K | 4-08      | Md/2009/T5   | R | R    | S | S | S | R    | MDR1h | 3    | yes | yes  | 2    | 2    |
| 97  | D09_K | 4-09      | Md/2009/T5   | S | R    | S | S | R | R    | MDR1h | 3    | yes | yes  | 2    | 1    |
| 98  | D09_K | 4-10      | Md/2009/T5   | R | R    | R | S | R | R    | MDR1h | 3    | yes | yes  | 2    | 2    |
| 99  | D10_B | S1-03     | Sa/2010/n.a. | R | S    | S | S | S | S    | no    | 0    | yes | n.a. |      | 1    |
| 100 | D10_B | S1-04     | Sa/2010/n.a. | R | S    | S | S | R | R    | no    | 0    | no  | n.a. | 2    | 1    |
| 101 | D10_B | S1-05     | Sa/2010/n.a. | R | R    | S | S | R | R    | MDR1h | 3    | yes | yes  | 2    | 1    |
| 102 | D10_B | S1-15     | Sa/2010/n.a. | R | S    | R | S | R | R    | MDR1  | 0    | no  | n.a. | 2    | 2    |
| 103 | D10_B | S1-17     | Sa/2010/n.a. | R | S    | S | S | R | R    | MDR1  | 0    | no  | n.a. | 2    | 1+2  |
| 104 | D10_B | S1-19     | Sa/2010/n.a. | S | S    | S | S | R | R    | MDR1  | 0    | no  | n.a. | 2    | 2    |
| 105 | D10_B | S1-24     | Sa/2010/n.a. | R | R    | R | S | R | R    | MDR1h | 3    | yes | yes  | 2    | 1    |
| 106 | D10_B | S1-27     | Sa/2010/n.a. | R | S    | S | S | R | S    | no    | 0    | no  | n.a. | 2    | 1    |
| 107 | D10_B | S1-28     | Sa/2010/n.a. | R | R    | R | S | R | R    | MDR1h | 3    | yes | yes  | 2    | 1    |
| 108 | D10_B | S3-02     | Sb/2010/T7   | R | R    | R | S | R | S    | MDR1h | 3    | yes | yes  | 2    | 1    |
| 109 | D10_B | S3-05     | Sb/2010/T7   | S | R    | S | S | R | S    | MDR1h | 0    | yes | yes  | 2    | 2    |
| 110 | D10_B | S3-06     | Sb/2010/T7   | R | R    | R | S | R | R    | MDR1h | 3    | yes | yes  | 2    | 2    |

|     |             |              |   |   |   |   |   |   |       |    |     |      |   |      |
|-----|-------------|--------------|---|---|---|---|---|---|-------|----|-----|------|---|------|
| 111 | D10_B_S3-07 | Sb/2010/T7   | S | S | R | S | S | S | MDR1  | 0  | yes | no   | 2 | 2    |
| 112 | D10_B_S3-08 | Sb/2010/T7   | S | S | R | R | R | S | MDR1h | 0  | yes | yes  | 2 | 1    |
| 113 | D10_B_S3-13 | Sb/2010/T7   | S | S | R | S | S | S | MDR1  | 0  | no  | no   | 2 | 1    |
| 114 | D10_B_S3-14 | Sb/2010/T7   | S | S | S | R | R | S | no    | 0  | no  | n.a. | 2 | 2    |
| 115 | D10_B_S3-16 | Sb/2010/T7   | S | S | R | S | S | S | MDR1  | 0  | no  | no   | 2 | 2    |
| 116 | D10_B_S3-19 | Sb/2010/T7   | S | S | S | R | R | R | MDR1  | 0  | no  | no   | 2 | 2    |
| 117 | D10_B_S3-20 | Sb/2010/T7   | R | R | S | R | R | R | MDR1h | 3  | yes | yes  | 2 | 1    |
| 118 | D10_B_S3-21 | Sb/2010/T7   | S | R | R | S | R | S | MDR1h | 3  | yes | yes  | 2 | 1    |
| 119 | D10_B_S3-22 | Sb/2010/T7   | S | R | R | S | R | S | MDR1h | 3  | yes | yes  | 2 | 2    |
| 120 | D10_B_S3-23 | Sb/2010/T7   | S | S | S | S | R | R | MDR1  | 0  | no  | no   | 2 | 1    |
| 121 | D10_B_S3-24 | Sb/2010/T7   | R | R | R | S | R | R | MDR1h | 3  | yes | yes  | 2 | 1    |
| 122 | D10_B_S3-27 | Sb/2010/T7   | R | R | S | S | R | R | MDR1  | 3  | yes | no   | 2 | 1    |
| 123 | D10_B_S4-03 | Sc/2010/T8   | S | R | S | S | R | S | MDR1h | 3  | yes | yes  | 2 | 1    |
| 124 | D10_B_S4-04 | Sc/2010/T8   | S | R | R | S | R | R | MDR1h | 3  | yes | yes  | 2 | 1    |
| 125 | D10_B_S4-07 | Sc/2010/T8   | R | R | R | S | R | R | MDR1h | 3  | yes | yes  | 2 | 2    |
| 126 | D10_B_S4-08 | Sc/2010/T8   | R | R | R | S | R | R | MDR1h | 3  | yes | yes  | 2 | 2    |
| 127 | D10_B_S4-09 | Sc/2010/T8   | R | R | S | S | R | R | MDR1h | 3  | yes | yes  | 2 | 1    |
| 128 | D10_B_S4-10 | Sc/2010/T8   | R | R | S | S | R | R | MDR1h | 14 | yes | yes  | 2 | 2    |
| 129 | D10_B_S4-16 | Sc/2010/T8   | R | R | R | S | R | R | MDR1h | 3  | yes | yes  | 2 | 1    |
| 130 | D10_B_S4-17 | Sc/2010/T8   | R | R | R | S | R | R | MDR1h | 3  | yes | yes  | 2 | 2    |
| 131 | D10_B_S4-18 | Sc/2010/T8   | R | R | R | S | R | R | MDR1h | 3  | yes | yes  | 2 | 2    |
| 132 | D10_B_S4-19 | Sc/2010/T8   | R | R | R | S | R | R | MDR1h | 3  | yes | yes  | 2 | 1    |
| 133 | D10_B_S4-20 | Sc/2010/T8   | R | R | R | S | R | R | MDR1h | 3  | yes | yes  | 2 | 2    |
| 134 | D10_B_S4-21 | Sc/2010/T8   | R | R | R | S | R | R | MDR1h | 3  | yes | yes  | 2 | 1    |
| 135 | D10_B_S4-23 | Sc/2010/T8   | R | R | S | S | R | R | MDR1h | 3  | yes | yes  | 2 | 1    |
| 136 | D10_B_S4-25 | Sc/2010/T8   | R | R | R | S | R | R | MDR1h | 3  | yes | yes  | 2 | 2    |
| 137 | D10_B_S4-26 | Sc/2010/T8   | R | R | S | S | R | R | MDR1h | 3  | yes | yes  | 2 | 1    |
| 138 | D10_B_S4-27 | Sc/2010/T8   | R | R | S | S | R | R | MDR1h | 3  | yes | yes  | 2 | 1    |
| 139 | D10_B_S4-28 | Sc/2010/T8   | S | S | S | R | R | S | no    | 0  | yes | no   | 2 | 2    |
| 140 | D10_B_S4-29 | Sc/2010/T8   | R | S | S | S | R | R | MDR1  | 3  | yes | no   | 2 | 1    |
| 141 | D10_B_S4-30 | Sc/2010/T8   | R | R | S | S | R | R | MDR1h | 3  | yes | yes  | 2 | 1    |
| 142 | D10_B_S4-31 | Sc/2010/T8   | R | R | R | S | R | R | MDR1h | 3  | yes | yes  | 2 | 2    |
| 143 | D10_B_S6-02 | Sc/2010/T9   | S | S | R | S | R | R | no    | 3  | yes | no   | 2 | 1    |
| 144 | D10_B_S6-10 | Sc/2010/T9   | S | S | S | R | R | S | no    | 3  | yes | no   | 2 | 2    |
| 145 | D10_B_S6-11 | Sc/2010/T9   | R | R | R | S | R | R | MDR1h | 3  | yes | yes  | 2 | 1+2  |
| 146 | D10_B_S6-12 | Sc/2010/T9   | S | S | S | S | S | S | MDR1  | 0  | yes | n.a. | 2 | n.a. |
| 147 | D10_B_S6-15 | Sc/2010/T9   | S | S | S | S | S | R | no    | 0  | no  | n.a. | 2 | 2    |
| 148 | D10_B_S6-17 | Sc/2010/T9   | S | S | R | R | R | R | no    | 3  | yes | n.a. | 2 | 1    |
| 149 | D10_B_S6-18 | Sc/2010/T9   | S | S | R | S | R | S | MDR1  | 0  | no  | n.a. | 2 | 1    |
| 150 | D10_B_S6-20 | Sc/2010/T9   | S | S | S | S | R | R | MDR1  | 0  | no  | n.a. | 2 | 2    |
| 151 | D10_B_S6-23 | Sc/2010/T9   | S | R | R | S | R | R | MDR1h | 3  | yes | yes  | 2 | 2    |
| 152 | D10_B_S6-24 | Sc/2010/T9   | S | S | R | R | R | R | no    | 0  | no  | n.a. | 2 | 1    |
| 153 | D10_B_S6-25 | Sc/2010/T9   | R | R | R | S | R | R | MDR1h | 3  | yes | yes  | 2 | 1    |
| 154 | D10_B_S6-26 | Sc/2010/T9   | S | S | R | S | S | S | MDR1  | 0  | no  | no   | 2 | 2    |
| 155 | D10_B_S6-27 | Sc/2010/T9   | R | R | S | S | R | S | MDR1h | 3  | yes | yes  | 2 | 2    |
| 156 | D10_B_S6-28 | Sc/2010/T9   | S | R | S | S | R | R | MDR1  | 3  | no  | no   | 2 | 1+2  |
| 157 | D10_B_S5-01 | Sd/2010/n.a. | S | S | S | R | R | S | no    | 3  | no  | n.a. | 2 | 1    |
| 158 | D10_B_S5-02 | Sd/2010/n.a. | S | S | R | S | R | R | no    | 13 | no  | n.a. | 2 | 2    |
| 159 | D10_B_S5-03 | Sd/2010/n.a. | S | S | R | S | S | S | MDR1  | 0  | no  | no   | 2 | 2    |
| 160 | D10_B_S5-05 | Sd/2010/n.a. | S | S | S | R | R | S | no    | 13 | no  | n.a. | 2 | 2    |
| 161 | D10_B_S5-06 | Sd/2010/n.a. | S | S | S | R | R | S | no    | 3  | yes | no   | 2 | 2    |
| 162 | D10_B_S5-09 | Sd/2010/n.a. | S | S | S | R | R | S | no    | 13 | no  | n.a. | 2 | 2    |
| 163 | D10_B_S5-11 | Sd/2010/n.a. | S | S | S | S | R | R | MDR1  | 0  | no  | n.a. | 2 | 1    |
| 164 | D10_B_S5-12 | Sd/2010/n.a. | S | S | S | S | S | S | MDR1  | 0  | yes | n.a. | 2 | 2    |
| 165 | D10_B_S5-16 | Sd/2010/n.a. | S | S | S | R | R | S | no    | 0  | yes | n.a. | 2 | 1    |
| 166 | D10_B_S5-18 | Sd/2010/n.a. | S | S | S | S | R | S | no    | 3  | no  | n.a. | 2 | 1    |
| 167 | D10_B_S5-19 | Sd/2010/n.a. | S | S | S | S | S | S | MDR1  | 0  | no  | n.a. | 2 | 1    |
| 168 | D10_B_S5-22 | Sd/2010/n.a. | S | S | R | S | S | S | MDR1  | 0  | no  | n.a. | 2 | 1+2  |
| 169 | D10_B_S5-23 | Sd/2010/n.a. | S | S | R | R | R | S | no    | 3  | yes | n.a. | 2 | 1    |
| 170 | D10_B_S5-24 | Sd/2010/n.a. | S | S | S | R | R | S | no    | 0  | yes | n.a. | 2 | 2    |
| 171 | D10_B_S5-25 | Sd/2010/n.a. | S | S | S | R | R | S | no    | 3  | yes | n.a. | 2 | 2    |
| 172 | D10_B_S5-26 | Sd/2010/n.a. | S | S | R | S | S | S | MDR1  | 0  | no  | n.a. | 2 | 1    |
| 173 | D10_B_S5-30 | Sd/2010/n.a. | S | S | S | R | R | S | no    | 0  | no  | n.a. | 2 | 2    |

**Table S2** *Botrytis* strains used for sequencing and MDR1-related analyses.

Host plants: GV: Grape vine; ST: Strawberry; FB: Faba bean; CP: *Caltha palustris*. \*Used for taxonomy-related sequencing. \*\* 3-bp triplet deletion ( $\Delta$ CTC1638/  $\Delta$ L497) confirmed by *mrr1* sequencing. MDR-related mutations are described according to nucleotide and amino acid numbers indicated in Fig. S2. \*\*\*Kindly provided by A.-S. Walker. n.a.: not analyzed.

| Strain name         | Species or group       | Host plant | Origin, year    | MDR (mutation)      | Reference    |
|---------------------|------------------------|------------|-----------------|---------------------|--------------|
| D06_1-30            | <i>B. cinerea</i> *    | GV         | Germany, 2006   | none                | This work    |
| D06_5-16            | <i>B. cinerea</i> *    | GV         | Germany, 2006   | MDR1 (G2044T/R632I) | (19)         |
| D06_3-4             | <i>B. cinerea</i>      | GV         | Germany, 2006   | MDR1 (G1858A/G620R) | (19)         |
| G09_S10             | <i>B. cinerea</i> *    | ST         | Greece, 2009    | none                | This work    |
| D11_M_E77           | <i>B. cinerea</i>      | ST         | Germany, 2011   | MDR1                | This work    |
| N11_S_E15           | <i>B. cinerea</i> *    | ST         | Norway, 2011    | n.a.                | This work    |
| N11_K_W08b          | <i>B. cinerea</i> *    | GV         | Norway, 2011    | n.a.                | This work    |
| D10_B_F3-07         | <i>B. cinerea</i>      | ST         | Germany, 2010   | MDR1 (G2044T/R632I) | This work    |
| D09_K_A31           | Group S*               | ST         | Germany, 2009   | MDR1h**             | This work    |
| D10_B_F1-06         | Group S*               | ST         | Germany, 2010   | None                | This work    |
| D10_B_F3-05         | Group S*               | ST         | Germany, 2010   | MDR1h**             | This work    |
| D10_K_S11-02        | Group S*               | ST         | Germany, 2010   | none                | This work    |
| S10_C1              | Group S*               | ST         | Spain, 2010     | MDR1h**             | This work    |
| G09_S2              | Group S*               | ST         | Greece, 2009    | none                | This work    |
| G09_S33             | Group S*               | ST         | Greece, 2009    | none                | This work    |
| N11_S_E08           | Group S*               | ST         | Norway, 2011    | n.a.                | This work    |
| N11_K_W11           | Group S*               | GV         | Norway, 2011    | n.a.                | This work    |
| D08_H_8-16          | Group S                | ST         | Germany, 2008   | MDR1h               | This work    |
| D09_K_A12           | Group S                | ST         | Germany, 2009   | MDR1 (C1993T/A615V) | This work    |
| D10_K_S11-04        | Group S                | ST         | Germany, 2010   | MDR1 (A959G/T296A)  | This work    |
| D10_K_S12-12        | Group S                | ST         | Germany, 2010   | MDR1 (C1993T/A615V) | This work    |
| MUCL395 (CBS109.57) | <i>B. fabae</i> *      | FB         | The Netherlands | n.a.                | BCCM         |
| MUCL98              | <i>B. fabae</i> *      | FB         | Spain           | n.a.                | BCCM         |
| MUCL7923            | <i>B. fabae</i> *      | FB         | Belgium         | n.a.                | BCCM         |
| 11002               | <i>B. fabae</i> *      | FB         | France          | n.a.                | This work*** |
| D04_57              | <i>B. pseudocin.</i> * | GV         | Germany, 2004   | none                | This work    |
| VD256               | <i>B. pseudocin.</i> * | GV         | France, 2007    | n.a.                | (45)         |
| N11_S_E06           | <i>B. pseudocin.</i> * | ST         | Norway, 2011    | n.a.                | This work    |
| MUCL1089            | <i>B. calthae</i> *    | CP         | Belgium         | n.a.                | (38)         |
| MUCL2830            | <i>B. calthae</i> *    | CP         | Canada          | n.a.                | (38)         |

**Table S3** Distribution of IGS-RFLP patterns in gray mold isolates from German strawberry fields (S) and vineyards (G). Patterns are numbered according to ref. (18).

| No. of isolates | Origin | Species/ genetic group        | IGS-PCR-RFLP pattern [%] |     |      |      |     |     |     |     |     |      |     |
|-----------------|--------|-------------------------------|--------------------------|-----|------|------|-----|-----|-----|-----|-----|------|-----|
|                 |        |                               | 0                        | 1   | 2    | 3    | 4   | 5   | 8   | 11  | 12  | 13   | 14  |
| 125             | S      | <i>B. cinerea</i> and group S | 33.6                     | 0   | 0    | 58.4 | 0.8 | 0.8 | 0   | 0   | 0   | 4.0  | 2.4 |
| 35              | S      | <i>B. cinerea</i>             | 77.1                     | 0   | 0    | 8.6  | 0   | 2.9 | 0   | 0   | 0   | 11.4 | 0   |
| 62              | S      | Group S (MDR1h)               | 6.5                      | 0   | 0    | 88.7 | 0   | 0   | 0   | 0   | 0   | 1.6  | 3.2 |
| 28              | S      | Group S (no MDR1h)            | 39.3                     | 0   | 0    | 53.6 | 3.6 | 0   | 0   | 0   | 0   | 0    | 3.6 |
| 137             | G      | <i>B. cinerea</i>             | 38.7                     | 0.7 | 49.0 | 0.7  | 0   | 5.8 | 2.2 | 0.7 | 2.2 | 0    | 0   |

**Table S4** Primers used in this work.

| Primer         | Gene          | Sequence                                  | Reference |
|----------------|---------------|-------------------------------------------|-----------|
| Mrr1_atg       | <i>mrr1</i>   | ATACCCGGGTCAACATCATGAATCCAACAGTC          | (19)      |
| TF1-2          | <i>mrr1</i>   | TCAATGTCCACCACACTCTCC                     | (19)      |
| TF1-2_n        | <i>mrr1</i>   | CTATCCGATCGACCGGTA                        | this work |
| TF1-3          | <i>mrr1</i>   | CGGTACAAAACGCACTGAG                       | (19)      |
| TF1-3_n        | <i>mrr1</i>   | TGCTGTGACGAGCATGAC                        | this work |
| TF1-4          | <i>mrr1</i>   | GGATAGGGTATTGCGTAGATCG                    | (19)      |
| TF1-5          | <i>mrr1</i>   | GTTGGCTTGTGCATAGTG                        | this work |
| TF1-6          | <i>mrr1</i>   | CAGGTTCTGATCCCAATG                        | this work |
| Mrr1-spez-F    | <i>mrr1</i>   | TATCGGTCTTGCAGTCCGC                       | this work |
| Mrr1-spez-R    | <i>mrr1</i>   | TTCCGTACCCCGATCTTCGGAA                    | this work |
| Mrr1-Pira      | <i>mrr1</i>   | CCACCACAATCTTGATCATTGGGATCAGAACCTGC       | this work |
| FG1020-F       | <i>fg1020</i> | GGAGGATGATATGGCAAAGTC                     | (27)      |
| FG1020-R       | <i>fg1020</i> | GGATTAAGAGCTTCACTACCA                     | (27)      |
| MS547-F        | RNA helicase  | AAGGAGGACGTTGGAAGGAT                      | (45)      |
| MS547-R        | RNA helicase  | AAGTCCAGAATCTCGATGTATTTGT                 | (45)      |
| Hsp60-F        | <i>hsp60</i>  | CAACAATTGAGATTTGCCACAAG                   | (38)      |
| Hsp60-R        | <i>hsp60</i>  | GATGGATCCAGTGGTACCGAGCAT                  | (38)      |
| Nep2(-200)for  | <i>nep2</i>   | GAGTTTCAGGTATATTCGTTTGGTGA                | (38)      |
| Nep2(+1147)rev | <i>nep2</i>   | GAACCTTGAATAGTGGGCAGTTGGG                 | (38)      |
| IGS1a          |               | TCCGGTGAGCCTTTTA                          | (18)      |
| IGS1b          |               | GTGGATTAGTGGCCGATGG                       | (18)      |
| Mat1-F         | <i>mat1-1</i> | GTGACCAGGAAACAGCTATGACCGGAGTGTGTTGATCGTGG | (1)       |
| Mat1-R         | <i>mat1-1</i> | GTGACTGTAAAACGACGGCCAGTCCACACATACATCATGAC | (1)       |
| BcHMG-F        | <i>mat1-2</i> | GTGACCAGGAAACAGCTATGACCGTCTCTTCCATAAGTCA  | (1)       |
| BcHMG-R        | <i>mat1-2</i> | GTGACTGTAAAACGACGGCCAGTCAAGATCAGACGGAGTGC | (1)       |
| BcHch262       | <i>hch</i>    | AAGCCCTTCGATGTCTTGGA                      | (11)      |
| BcHch520L      | <i>hch</i>    | ACGGATTCCGAACCTAAGTAA                     | (11)      |
| atrBfor        | <i>atrB</i>   | GCACCTTGTGGCGAGTATCTATC                   | (19)      |
| atrBrev        | <i>atrB</i>   | TGCATCCCTCCATCCATAGC                      | (19)      |
| actfor         | <i>actin</i>  | TCTGTCTTGGGTCTTGAGAG                      | (19)      |
| actrev         | <i>actin</i>  | GGTGCAAGAGCAGTGATTC                       | (19)      |

## References

1. **Amselem, J., C.A. Cuomo, J.A.L. van Kan, M. Viaud, E.P. Benito, A. Couloux, P.M. Coutinho, R.P. de Vries, P.S. Dyer, S. Fillinger, E. Fournier, L. Gout, M. Hahn, K.M. Plummer, J.M. Pradier, E. Quévillon, A. Sharon, A. Simon, A. ten Have, B. Tudzynski, P. Tudzynski, M. Andrew, V. Anthouard, R.E. Beever, R. Beffa, I. Benoit, O. Bouzid, B. Brault, Z. Chen, M. Choquer, J. Collémare, P. Cotton, E.G. Danchin, C. Da Silva, A. Gautier, C. Giraud, T. Giraud, C. Gonzalez, S. Grossetete, U. Güldener, B. Henrissat, B.J. Howlett, C. Kodira, M. Kretschmer, A. Lappartient, M. Leroch, C. Levis, E. Mauceli, C. Neuvéglise, B. Oeser, M. Pearson, J. Poulain, N. Pousserau, H. Quesneville, C. Rasclé, J. Schumacher, B. Ségurens, A. Sexton, E. Silve, C. Sirven, D.M. Soanes, N.J. Talbot, M. Templeton, C. Yandava, O. Yarden, Q. Zeng, J.A. Rollins, M.H. Lebrun, and M. Dickman.** 2011. Genomic analysis of the necrotrophic fungal pathogens *Sclerotinia sclerotiorum* and *Botrytis cinerea*. *PLoS Genet.* **7(8)**: e1002230.
11. **Fournier, E., C. Levis, D. Fortini, P. Leroux, T. Giraud, and Y. Brygoo.** 2003. Characterisation of the Bc-hch, the *Botrytis cinerea* homolog of the *Neurospora crassa* *het-c* vegetative incompatibility locus, and its use as a population marker. *Mycologia* **95**:252-261.
12. **Fournier, E., T. Giraud, C. Albertini, and Y. Brygoo.** 2005. Partition of the *Botrytis cinerea* complex in France using multiple gene genealogies. *Mycologia* **97**:1251-1267.
18. **Kretschmer, M., and M. Hahn.** 2008. Fungicide resistance and genetic diversity of *Botrytis cinerea* isolates from a vineyard in Germany. *J. Plant Dis. Protect.* **115**:214-219.
19. **Kretschmer, M., M. Leroch, A. Mosbach, A.S. Walker, S. Fillinger, D. Mernke, H.J. Schoonbeek, J.M. Pradier, P. Leroux, M.A. de Waard, and M. Hahn.** 2009. Fungicide-driven evolution and molecular basis of multidrug resistance in field populations of the grey mould fungus *Botrytis cinerea*. *PLOS Path.* **5**:e1000696.
27. **Marthey, S., G. Aguilera, F. Rodolphe, A. Gendrault, T. Giraud, E. Fournier, M. Lopez-Villavicencio, A. Gautier, M.H. Lebrun, and H. Chiapello.** 2008. FUNYBASE: a fungal phylogenomic database. *BMC Bioinformatics* **9**:456.
38. **Staats, M., P. van Baarlen, and J.A.L. van Kan.** 2005. Molecular phylogeny of the plant pathogenic genus *Botrytis* and the evolution of host specificity. *Mol. Biol. Evol.* **22**:333–346.
45. **Walker, A.S., A.L. Gautier, J. Confais, D. Martinho, M. Viaud, P. Le Pêcheur, J. Dupont, and E. Fournier.** 2011. *Botrytis pseudocinerea*, a new cryptic species causing grey mould in French vineyards in sympatry with *Botrytis cinerea*. *Phytopathology* **101**:1433-1445.
50. **Zhang, J., M.D. Wu, G.Q. Li, L. Yang, L. Yu, and D.H. Jiang.** 2010. *Botrytis fabiopsis*, a new species causing chocolate spot of broad bean in central China. *Mycologia* **102**:1114-1126.
